# Supplementary material for: Improved Runoff Simulations for a Highly Varying Soil Depth and Complex Terrain Watershed in the Loess Plateau with the Community Land Model
Source: Copernicus journal article supplement (doi:10.5194/gmd-2021-212), 2021-08-26
Supplement: Supplementary file [file gmd-2021-212-AC2-supplement.pdf]

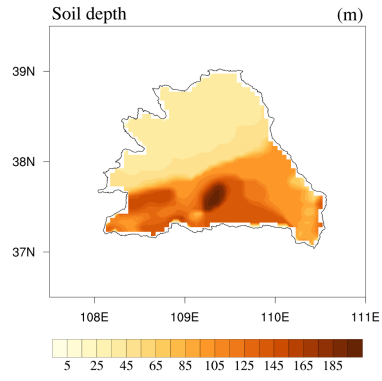

Figure S1. The geographic distribution of the soil depth for the WRB.
