# Supplementary material for: Improved Runoff Simulations for a Highly Varying Soil Depth and Complex Terrain Watershed in the Loess Plateau with the Community Land Model
Source: Copernicus journal article supplement (doi:10.5194/gmd-2021-212), 2021-08-26
Supplement: Supplementary file [file gmd-2021-212-AC3-supplement.pdf]

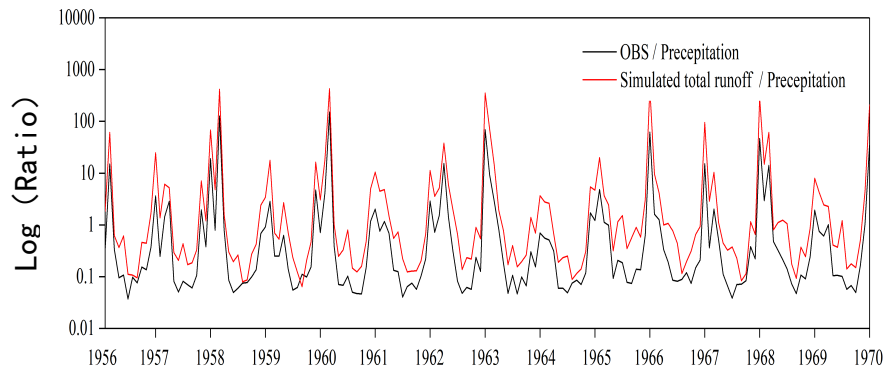

Figure S2. The ratios of the observed (dark line) and simulated (red line) runoff (default model) to observed precipitation for the WRB over the period of 1956-1969 based on the default options of CLM.
